# Supplementary material
Source: PubMed Central journal article supplement (PMC8679510)
Supplement: NIHMS1718519-supplement-eTable_1.pdf [file NIHMS1718519-supplement-eTable_1.pdf]

19 eTable 1. Model Estimates for Failure-to-Rescue

| Characteristic                                                        | Major Complications |                |         |
|-----------------------------------------------------------------------|---------------------|----------------|---------|
|                                                                       | Estimate            | Standard Error | p value |
| <b>Demographics</b>                                                   |                     |                |         |
| Age (years, normalized in the model)                                  | 0.270               | 0.036          | 0.000   |
| Female                                                                | 0.203               | 0.082          | 0.013   |
| <b>Body Surface Area (meter<sup>2</sup>, normalized in the model)</b> |                     |                |         |
| <1.6                                                                  | Ref                 |                |         |
| 1.6-1.8                                                               | 0.075               | 0.158          | 0.632   |
| 1.8-1.99                                                              | -0.322              | 0.156          | 0.040   |
| >=1.99                                                                | -0.319              | 0.155          | 0.040   |
| <b>Cardiac History</b>                                                |                     |                |         |
| <b>Cerebrovascular Disease</b>                                        |                     |                |         |
| Neither                                                               | Ref                 |                |         |
| Cerebrovascular Disease Alone                                         | 0.035               | 0.102          | 0.733   |
| Cerebrovascular Disease and Stroke                                    | 0.088               | 0.103          | 0.391   |
| Percutaneous Coronary Intervention <6 h                               | 0.813               | 0.210          | 0.000   |

| Overall Complications |                |         |
|-----------------------|----------------|---------|
| Estimate              | Standard Error | p value |
| 0.325                 | 0.037          | < 2e-16 |
| 0.264                 | 0.085          | 0.002   |
| Ref                   |                |         |
| -0.024                | 0.159          | 0.880   |
| -0.386                | 0.158          | 0.015   |
| -0.372                | 0.157          | 0.017   |
| Ref                   |                |         |
| 0.119                 | 0.104          | 0.252   |
| 0.126                 | 0.110          | 0.254   |
| 0.611                 | 0.239          | 0.011   |

| <b>Risk Factors</b>            |        |       |       |
|--------------------------------|--------|-------|-------|
| Ejection fraction              |        |       |       |
| <40                            | Ref    |       |       |
| 40-50                          | -0.227 | 0.102 | 0.026 |
| 50-60                          | -0.383 | 0.096 | 0.000 |
| >=60                           | -0.243 | 0.095 | 0.011 |
| Diabetes control               |        |       |       |
| Insulin Control                | Ref    |       |       |
| Diabetes with Other Control    | -0.006 | 0.097 | 0.948 |
| No Diabetes                    | 0.073  | 0.092 | 0.425 |
| Previous Valve                 | 1.222  | 0.405 | 0.003 |
| Peripheral Vascular Disease    | 0.191  | 0.082 | 0.020 |
| Dialysis                       | 0.886  | 0.135 | 0.000 |
| Chronic lung disease           |        |       |       |
| None                           | Ref    |       |       |
| Mild                           | 0.193  | 0.091 | 0.035 |
| Moderate                       | 0.317  | 0.133 | 0.017 |
| Severe                         | 0.547  | 0.121 | 0.000 |
| Cardiogenic Shock on admission | 0.416  | 0.132 | 0.002 |

|        |       |       |
|--------|-------|-------|
|        |       |       |
| Ref    |       |       |
| -0.241 | 0.107 | 0.024 |
| -0.365 | 0.099 | 0.000 |
| -0.357 | 0.099 | 0.000 |
|        |       |       |
| Ref    |       |       |
| -0.263 | 0.101 | 0.009 |
| -0.136 | 0.095 | 0.151 |
| 1.183  | 0.422 | 0.005 |
| 0.169  | 0.087 | 0.051 |
| 0.730  | 0.142 | 0.000 |
|        |       |       |
| Ref    |       |       |
| 0.365  | 0.095 | 0.000 |
| 0.563  | 0.136 | 0.000 |
| 0.782  | 0.129 | 0.000 |
| 0.472  | 0.153 | 0.002 |

|                                           |        |       |         |
|-------------------------------------------|--------|-------|---------|
| Admission Acuity                          |        |       |         |
| Elective                                  | Ref    |       |         |
| Urgent                                    | -0.017 | 0.086 | 0.844   |
| Emergent                                  | -0.007 | 0.147 | 0.963   |
| Emergent /Salvage                         | 0.911  | 0.336 | 0.007   |
| <b>Complication Types</b>                 |        |       |         |
| Stroke                                    | 1.049  | 0.104 | < 2e-16 |
| Deep Sternal Wound Infection              | 0.138  | 0.259 | 0.595   |
| Any Reoperation                           | 0.738  | 0.074 | < 2e-16 |
| Prolonged Ventilation                     | 1.445  | 0.098 | < 2e-16 |
| Renal Failure                             | 1.659  | 0.079 | < 2e-16 |
| Renal Dialysis                            |        |       |         |
| Dysrhythmia requiring Permanent Pacemaker |        |       |         |
| Cardiac Arrest                            |        |       |         |
| Anticoagulation Event                     |        |       |         |
| Tamponade                                 |        |       |         |
| Gastrointestinal Event                    |        |       |         |
| Multi-organ system failure                |        |       |         |
| Atrial Fibrillation                       |        |       |         |

|        |       |         |
|--------|-------|---------|
|        |       |         |
| Ref    |       |         |
| 0.050  | 0.087 | 0.564   |
| 0.279  | 0.160 | 0.081   |
| 1.665  | 0.366 | 0.000   |
|        |       |         |
| 1.361  | 0.119 | < 2e-16 |
| 1.935  | 0.441 | 0.000   |
| 0.346  | 0.090 | 0.000   |
| 0.596  | 0.082 | 0.000   |
| 0.482  | 0.170 | 0.005   |
| 0.590  | 0.195 | 0.003   |
| -1.680 | 0.212 | 0.000   |
| 3.253  | 0.082 | < 2e-16 |
| -0.219 | 0.199 | 0.271   |
| 1.460  | 0.731 | 0.046   |
| -0.011 | 0.119 | 0.924   |
| 3.361  | 0.157 | < 2e-16 |
| -0.924 | 0.076 | < 2e-16 |

|                         |  |  |  |
|-------------------------|--|--|--|
| Aortic Dissection       |  |  |  |
| Sepsis                  |  |  |  |
| Surgical Site Infection |  |  |  |
| Coma                    |  |  |  |
| Pneumonia               |  |  |  |
| Pulmonary Embolism      |  |  |  |

|        |       |       |
|--------|-------|-------|
| 0.214  | 0.881 | 0.808 |
| 0.736  | 0.149 | 0.000 |
| -1.887 | 0.334 | 0.000 |
| -0.042 | 0.110 | 0.705 |
| -0.233 | 0.115 | 0.042 |
| 0.030  | 0.397 | 0.939 |

20

21
